# Supplementary material
Source: ML conference proceedings conference paper supplement (https://openreview.net/forum?id=srHMs3mPD5y)
Supplement: supplementary_material [file attachment]

---

# Supplementary material for "FETA: Towards Specializing Foundation Models for Expert Task Applications"

---

Amit Alfassy\*<sup>1,3</sup> Assaf Arbelle\*<sup>1</sup> Oshri Halimi<sup>1,3</sup> Sivan Harary<sup>1</sup>  
Roei Herzig<sup>1</sup> Eli Schwartz<sup>1</sup> Rameswar Panda<sup>1</sup> Michele Dolfi<sup>1</sup> Christoph Auer<sup>1</sup>  
Kate Saenko<sup>2,4</sup> Peter W. J. Staar<sup>1</sup> Rogerio Feris<sup>2</sup> Leonid Karlinsky\*<sup>2</sup>

<sup>1</sup>IBM Research, <sup>2</sup>MIT-IBM AI-Watson Lab, <sup>3</sup>Technion, <sup>4</sup>Boston University

1 In these supplementary materials, we provide additional information about our data, baseline methods,  
2 implementation details, experimental results, and qualitative examples. Specifically, Section 6 provides  
3 additional implementation details about the data collection and processing pipelines, Section 3  
4 provides additional details on the training procedure and runtime. In Section 4 we provide extensive  
5 an extensive ablation study, several additional results including results of the FLAVA [5] FM model  
6 and results of our CLIP-based models on the IKEA dataset. In Sections 5-7 we provide information  
7 about the code, data download and the license.

## 8 1 Data Collection Details

### 9 1.1 Data Download and Conversion

10 **Car Manuals:** The car manuals data was downloaded from <https://www.workshopservicemanual.com>.  
11 Table 1 of the original paper details the amount of documents downloaded by car manufacturers. The  
12 documents contained an average of 149 pages per document.

13 **IKEA Catalogs:** The IKEA catalogs data was initially presented in [8] and downloaded from  
14 <https://github.com/ivc-yz/SSR>. The data consisted of 29 IKEA US catalogs between the years 1986  
15 and 2005, each document contain an average of 283 pages.

16 The downloaded documents were processed by the DeepSearch tool <https://ds4sd.github.io/> which  
17 extracted the images and the texts. The extracted texts were further processed to create large,  
18 consecutive chunks of texts. We removed bad characters artifacts created during PDF parsing, we  
19 also filtered improbable boxes and failed boxes, finally we merged together spatially close text boxes.

20 The final result of our data conversion can be seen in Figures 5-7 for examples from the IKEA dataset  
21 and Figures 8-10 for examples from the Car-Manuals dataset. Red boxes mark extracted text blocks,  
22 blue boxes mark extracted images.

### 23 1.2 Identical Image Detection Process

24 We found that the car manual data includes images which reappear in several different locations  
25 within the same manual. Since our automatic annotation links images and texts which are located  
26 in the same page, retrieving a correct image but from a different page can artificially lower the test  
27 results. As our goal was to keep the flow unsupervised as much as possible, in order to overcome this  
28 issue we processed the images in three steps. First, we trained a self-supervised network on all the  
29 data in order to get meaningful image features. For that we used DINO [1], which we have found to

30 create good image representations due to its loss function which inherently produces good clusters in  
31 the embedded space. As a second step, for each image we selected the top ten nearest neighbors in  
32 the embedded space. Lastly we performed Normalized Cross Correlation [6] filtering on the selected  
33 images and selected images with correlation higher than  $t > 0.7$ . These images were treated as  
34 identical images during test time. For the retrieval tests, the sets of texts matching to identical images  
35 were merged (by their union), and there was no penalty when retrieving an identical image from a  
36 different page. It is important to note that the DINO model used for identical images filtering was  
37 used only for that and not used in our experiments in any other way.

### 38 **1.3 Text bounding box merging**

39 OCR engines sometimes fail in parsing full paragraphs and end up splitting them to numerous  
40 bounding boxes. In order to lessen the effect such OCR errors has on FETA, we use a mechanism to  
41 merge adjacent bounding boxes into one bounding box. The process has 2 stages, in the first stage  
42 We employ a dilation technique in which we increase the length of each of the box's horizontal edges  
43 by a constant which is a percentage of the page's horizontal length (we used 1%), we also increase  
44 the length of each box's vertical edge by a bigger constant (4\* times the horizontal constant) as text  
45 bounding boxes tend to be wide and short. This creates some overlaps between neighboring boxes. In  
46 the second stage we merge all the boxes which has any kind of overlap between them. Each group of  
47 overlapping boxes are merged into a bounding box that minimally contains the boxes being merged.

### 48 **1.4 Manual Annotation Statistics**

49 We created manual annotations for part of the Car Manuals dataset. Our manually labeled data  
50 consists of 15 documents and has 449 image-text pairs. We randomly selected these 15 documents,  
51 making sure to select at least two documents from each manufacturer. We then manually selected up  
52 to 50 images per document and manually generated (by a human expert) the image description using  
53 the information on the page as technical reference. This annotation was used to both validate the test  
54 results obtained on the automatically curated data and demonstrate that pre-training on automatically  
55 curated data indeed improves results on manually annotated data (Table 3 in the main paper). From  
56 Tables 2 and 3 in the main paper show that the same trends in terms of relative performance of  
57 different baselines appear both on the manual and the automatically curated data.

### 58 **1.5 Further details on the automatic annotation**

59 Figure 1 show the main steps in creating our automatic annotation of images - texts bags, the figure  
60 demonstrate the automatic process from a zip of PDFs to bags annotations which enable MIL training  
61 and test on the data. The steps are shown on an example pages from the cars dataset. The images  
62 above the flow chart show the creation of image-texts bags, while the images below the flow chart  
63 shot the creation of text-images bags.

## 64 **2 Additional data analysis**

### 65 **2.1 Automatic vs manual text annotations cover**

66 In order to asses the quality of the automatic annotations, we compare here between the manual anno-  
67 tations and automatic annotations. In this test we consider only the manually annotated documents.  
68 We report the percentage of the times, when looking at a specific image, the manually annotated text  
69 is contained within the automatically extracted texts for that same image (with a significant overlap).  
70 Over the cars data the cover is 93 percent. This high overlap is aligned with the Multiple Instance  
71 Learning setting where the MIL bag is assumed to contain at least one true sample. We consider the  
72 remainder or 7% as annotation noise. In the future versions of FETA it would be possible to increase  
73 this coverage by considering extracting text from adjacent pages, as well as using PDF sections  
74 parsing results.

75 **2.2 Data quality check**

76 We have asked three external reviewers to go over a subset of the automatic annotations. Each  
 77 reviewer was asked to rate the annotation as good or bad, we present the findings of this experiment  
 in Table 1.

**Table 1: Data quality check of automatic annotations**

|                       | Good (out of 3) |       |       |
|-----------------------|-----------------|-------|-------|
|                       | 1+              | 2+    | 3     |
| Automatic annotations | 93.6%           | 90.2% | 82.3% |

78

79 **2.3 Data statistics and comparison to other datasets**

80 In order to further demonstrate the difference and resemblance between cars and IKEA data sets  
 81 to each and to other popular data sets, we show some data statistics in Table 2, all tokens data was  
 82 calculated by us using CLIP’s tokenizer. Word count to vocabulary size was calculated as the number  
 83 of words occurrences in the entire dataset divided by a set of all unique words, present in the dataset,  
 84 all number except CC3M(taken from original paper) were calculated by us. Image-page ratio reports  
 the ratio between image area to entire page area in the dataset.

**Table 2: Data Statistics** In this table we compare the statistics of the texts in the Car-Manuals and  
 IKEA datasets to common V&L datasets, i.e COCO, Flickr30K and CC3M

| Measure                       | Cars  | IKEA  | Flickr30k | COCO  | CC3M    |
|-------------------------------|-------|-------|-----------|-------|---------|
| Mean tokens per caption       | 44.2  | 59.1  | 15.7      | 13.5  | 10.3    |
| Std tokens per caption        | 67.3  | 83.9  | 5.6       | 2.7   | 4.5     |
| Unique tokens                 | 11152 | 14942 | 15351     | 17624 | 51201   |
| Average words per image       | 79.5  | 208.9 | 66.9      | 53    | 51.5    |
| Word count to vocabulary size | 48.3  | 14.3  | 87.4      | 97.2  | 804.8   |
| Total images number           | 52119 | 9574  | 31783     | 82783 | 3318333 |

85

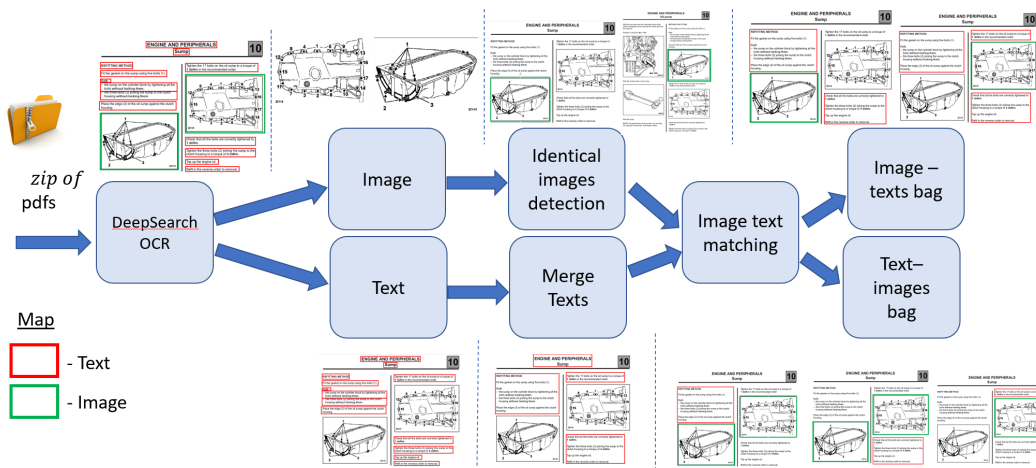

**Figure 1: Simplified figure explaining the automatic annotation process** showed using an example  
 page from the cars dataset.

86 **2.4 Common nouns and adjectives in data**

87 To further understand the difference between the Car-Manuals and IKEA datasets to each other and  
 88 to other popular datasets we report the most common nouns and adjectives present in each dataset  
 89 sorted by appearance count. As can be seen in Figures 2 and 3 and in Tables 3 and 4, the nouns  
 90 and adjectives from Flickr30K, COCO, CC3M are very similar and all three include nouns such as:  
 91 person, beach etc. also, they all use the same adjectives such as white, young, etc. It seems that those  
 92 3 very popular datasets all reside in a very close domain and treat the same kind of popular data of  
 93 natural images. When looking at the nouns and adjectives in Cars and IKEA, we see nouns such as:  
 94 engine, connector, table, cotton which are specific to the expert domain each dataset deals with. We  
 95 also see adjectives like, diagnostic, new, solid, adjustable which are again a strong characteristic of the  
 96 expert domains of Cars and IKEA. The resemblance between Flickr30K, COCO and CC3M, coupled  
 97 with the difference between them to our Cars and IKEA datasets, further strengthen our claim that  
 98 FETA can indeed be useful in order to expand current FMs research to new under studied domains of  
 99 expert V&L tasks which may provide noticeable value for practical real world applications.

Table 3: **Most common nouns by dataset** ordered by count from left to right.

| Dataset   | Most Common Nouns                                                                                                                                                                          |
|-----------|--------------------------------------------------------------------------------------------------------------------------------------------------------------------------------------------|
| Cars      | engine, switch, connector, control, front, harness, oil, air, fuel, installation, system, rear, caution, ignition, position, vehicle, side, ground, terminal, brake, door, unit, cylinder. |
| IKEA      | table, steel, bed, cotton, glass, frame, cover, storage, designer, pine, finish, unit, design, sofa, chair, shelf, cabinet, plastic, birch, veneer, wall, door, seat, lamp, set            |
| Flickr30K | man, woman, people, shirt, girl, boy, men, dog, street, child, women, person, water, children, group of people, hat, background, beach, ball, sidewalk.                                    |
| COCO      | man, people, woman, person, group, table, street, tennis, train, dog                                                                                                                       |
| CC3M      | person, actor, artist, player, premiere, football, woman, beach, game, girl                                                                                                                |

Table 4: **Most common adjectives by dataset** ordered by count from left to right.

| Dataset   | Most Common Adjectives                                                                                                                                                       |
|-----------|------------------------------------------------------------------------------------------------------------------------------------------------------------------------------|
| Cars      | new, open, diagnostic, necessary, short, upper, main, idle, high, other, normal, low, electric, manual, same, negative, positive, active, foreign, hot, old                  |
| IKEA      | white, solid, black, clear, easy, adjustable, new, red, available, high, limited, green, washable, removable, extra, natural, low, last, soft, other, different, full, good, |
| Flickr30K | young, white, black, blue, red, little, green, other, large, yellow, small, brown, older, several, asian, gray, old, many, blond, dark.                                      |
| COCO      | white, two, large, small, front, red, young, black, young,                                                                                                                   |
| CC3M      | white, young, day, black, red, blue, old, new, night, green, first, front                                                                                                    |

100 **2.5 Choice of evaluation metric**

101 We chose the text-to-image and image-to-text retrieval task for two main reasons: This metric is  
 102 directly aligned with the popular contrastive training objective used for most of V&L models (e.g.  
 103 CLIP or FLAVA) and as such should be their strongest suit. We however show that even under this  
 104 metric CLIP under performs on FETA expert tasks compared to its performance demonstrated for e.g.  
 105 photos of common objects. This metric is also possible to compute when regarding the automatic  
 106 annotation process. In our automatic process, little is known a priori about the data. The assumption  
 107 that co-location of text and images is strongly correlated with the semantics is a relatively general  
 108 assumption. As shown in our Results in section 4.3 and in Table 3 of the main paper, our choice  
 109 of automatic metric is valid as it gives the same conclusions using the same models and baselines  
 110 performance as evaluated on the manually annotated and curated data.

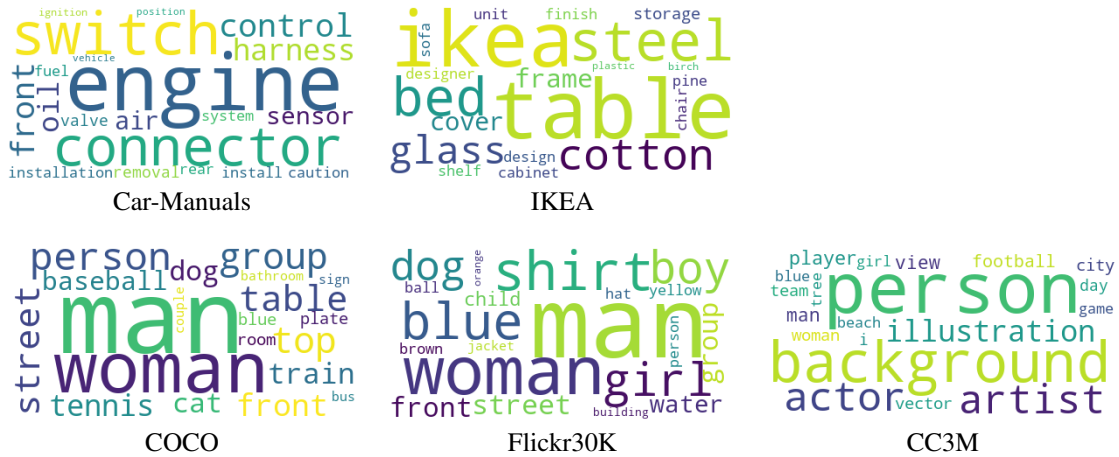

Figure 2: A Visual representation of the most common nouns in the Car-Manuals and IKEA datasets, compared to COCO, Flickr30K, and CC3M

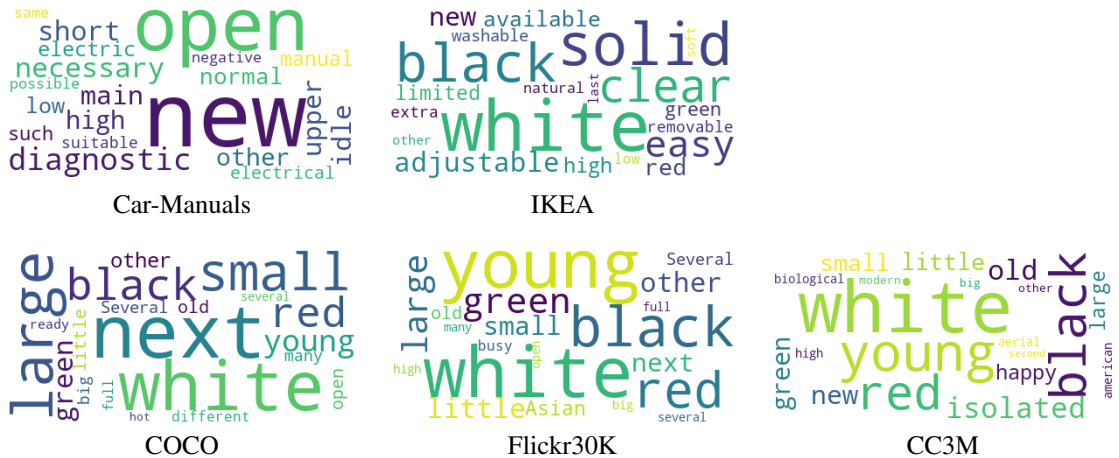

Figure 3: A Visual representation of the most common adjectives in the Car-Manuals and IKEA datasets, compared to COCO, Flickr30K, and CC3M

### 111 3 Additional Implementation Details

112 **Training Epochs:** In general we train all MIL variants for 20 epochs, however we found that for  
 113 the Zero-Shot and Few-Shot settings of the car manuals data we found that this amount results in  
 114 over-fitting. We thus trained these two settings with only two epochs which we found to yield the  
 115 best results.

## 116 4 Additional results

### 117 4.1 MIL Variants Ablation

118 In Section 3.2 of the paper we discussed several options for training CLIP under the MIL setting.  
 119 Table 5 shows the performance for the three MIL variants on the Few-Shot and Many-Shot test  
 120 settings. These results confirm that in the majority of the cases, MIL-NCE achieves the highest  
 121 performing results. We therefore chose to use this MIL variant in all of experiments in the main paper  
 122 where the MIL baselines are evaluated.

Table 5: **MIL Variant Ablations:** Image-to-Text and Text-to-Image retrieval accuracy for three MIL fine-tuning baseline variants under two different data-split settings. Our experimental settings is the same as Table 2 from the main paper but only include Many-Shot and Few-Shot (the more practical settings). The "Locked" column refers to versions trained with locked (frozen) parameters of the image encoder  $\mathcal{M}_I$ . Numbers in **bold** mark the best results while numbers in **blue** mark the second-best.

|           | Name             | Locked | Image-to-Text |              |              | Text-to-Image |              |              |
|-----------|------------------|--------|---------------|--------------|--------------|---------------|--------------|--------------|
|           |                  |        | Rec@1         | Rec@5        | Rec@10       | Rec@1         | Rec@5        | Rec@10       |
| Few-Shot  | CLIP-MIL-SOFTMAX |        | <b>14.6%</b>  | <b>34.4%</b> | 47.5%        | 13.4%         | 34.7%        | 47.8%        |
|           | CLIP-MIL-SOFTMAX | ✓      | 13.4%         | 33.5%        | 46.6%        | 12.2%         | 34.1%        | 47.8%        |
|           | CLIP-MIL-MAX     |        | 13.7%         | 34.5%        | <b>47.8%</b> | <b>15.7%</b>  | <b>34.8%</b> | 48.4%        |
|           | CLIP-MIL-MAX     | ✓      | 13.5%         | 33.9%        | 46.4%        | 12.3%         | 34.7%        | <b>48.5%</b> |
|           | CLIP-MIL-NCE     |        | <b>14.1%</b>  | <b>36.7%</b> | <b>48.9%</b> | <b>15.0%</b>  | <b>35.2%</b> | <b>50.0%</b> |
|           | CLIP-MIL-NCE     | ✓      | 13.8%         | 33.7%        | 47.5%        | 11.6%         | 33.0%        | 47.0%        |
| Many-Shot | CLIP-MIL-SOFTMAX |        | 32.0%         | 54.8%        | 65.7%        | 26.5%         | <b>58.1%</b> | <b>71.3%</b> |
|           | CLIP-MIL-SOFTMAX | ✓      | 34.1%         | 56.5%        | <b>66.4%</b> | 26.7%         | 58.0%        | 70.3%        |
|           | CLIP-MIL-MAX     |        | <b>34.4%</b>  | <b>56.7%</b> | 66.2%        | <b>27.3%</b>  | 57.9%        | 71.1%        |
|           | CLIP-MIL-MAX     | ✓      | 31.2%         | 54.7%        | 65.7%        | 26.2%         | <b>58.1%</b> | <b>71.3%</b> |
|           | CLIP-MIL-NCE     |        | 32.6%         | 56.2%        | <b>66.7%</b> | <b>27.8%</b>  | <b>59.0%</b> | <b>72.3%</b> |
|           | CLIP-MIL-NCE     | ✓      | <b>34.5%</b>  | <b>56.8%</b> | 66.1%        | 27.2%         | 57.9%        | 70.7%        |

123 **4.2 CLIP Architecture**

124 In this section we present equivalent results to Table 2 from the main paper, using the ViT-L/14  
 125 backbone instead of ResNet50. Table 6 shows consistent baseline relative comparison results with  
 126 the results presented in Table 2 of the main paper. As we can see from Table 6, using the ViT-  
 127 L/14 backbone leads to higher performance (compared to ResNet50) with the CLIP-MIL options  
 128 maintaining their significant gains under this stronger backbone.

129 **4.3 Evaluating Additional Foundation Model**

130 In Table 2 of the main paper we have added the evaluation of three of the strongest performing  
 131 and the most recent of the openly available foundation models - FLAVA [5], ALBEF[3] and  
 132 ViT[2] to our set of Car-Manuals data evaluations comparing it to CLIP and our MIL base-  
 133 lines. For FLAVA, We used the released pre-trained FLAVA model available on Huggingface:  
 134 [https://huggingface.co/docs/transformers/model\\_doc/flava](https://huggingface.co/docs/transformers/model_doc/flava). We used facebook/flava-full pre-trained  
 135 model. We evaluated both *contrastive* and *ITM* matching scores available in FLAVA and report  
 136 results for the contrastive score, as it produced better results in all evaluations. We observe that  
 137 stronger (relative to CLIP) common-objects performance reported by FLAVA, does not translate to  
 138 improved numbers on FETA expert car manuals task. For ALBEF and ViT we have used the the  
 139 VL-Checklist git repository [7]. We have used their code in order to obtain image-text scores between  
 140 all image texts pairs in each document and used them in our retrieval test. As with FLAVA, the results  
 141 for ALBEF and ViT are lower than CLIP and these models struggle in zero-shot performance on  
 142 our data. We believe that this further supports our hypothesis that FMs need to be fine-tuned on  
 143 the expert tasks as their out-of-the-box performance on these tasks is low. This is most likely due  
 144 to bias towards common as is stated in the main paper. These experiments underline the need for  
 145 our proposed FETA benchmark in order to improve the applicability of FMs to practical real-world  
 146 problems often involving specialized expert V&L data.

147 **4.4 Pre-trained CLIP vs Training from Scratch**

148 All of the experiments presented in the main paper and the supplementary material initialize the  
 149 training from a pre-trained CLIP model trained on 400M image-text pairs. In this section we examine  
 150 the effect of training the ResNet50 CLIP model from scratch on the car manuals dataset. Table 7

Table 6: **Results using ViT-L/14 backbone** pre-trained by CLIP. Using the ViT-L/14 backbone leads to higher performance (compared to ResNet50) with the CLIP-MIL options maintaining their significant gains under this stronger backbone. Numbers in **bold** mark the best results while numbers in **blue** mark the second-best.

|           |             | Image-to-Text |              |              | Text-to-Image |              |              |              |
|-----------|-------------|---------------|--------------|--------------|---------------|--------------|--------------|--------------|
|           | Name        | Locked        | Rec@1        | Rec@5        | Rec@10        | Rec@1        | Rec@5        | Rec@10       |
| Zero-Shot | CLIP [4]    |               | 11.8%        | 29.5%        | 41.1%         | 12.0%        | 32.6%        | 46.6%        |
|           | Concatenate |               | 12.0%        | 31.8%        | 44.6%         | 11.7%        | 31.7%        | 45.1%        |
|           | Concatenate | ✓             | 12.2%        | 32.0%        | 44.6%         | 10.6%        | 30.8%        | 44.5%        |
|           | Choose-One  |               | 12.7%        | 31.4%        | 43.0%         | 11.8%        | 31.9%        | 46.0%        |
|           | Choose-One  | ✓             | 12.8%        | 31.6%        | 44.6%         | 11.2%        | 31.6%        | 45.3%        |
|           | CLIP-MIL    |               | <b>13.6%</b> | <b>32.9%</b> | <b>46.5%</b>  | <b>13.2%</b> | <b>34.2%</b> | <b>47.8%</b> |
|           | CLIP-MIL    | ✓             | <b>14.0%</b> | <b>33.5%</b> | <b>46.3%</b>  | <b>13.1%</b> | <b>34.3%</b> | <b>47.4%</b> |
| One-Shot  | CLIP [4]    |               | 11.8%        | 29.5%        | 41.1%         | 12.0%        | 32.6%        | 46.6%        |
|           | Concatenate |               | 12.8%        | 24.4%        | 35.8%         | 11.4%        | 31.7%        | 45.9%        |
|           | Concatenate | ✓             | 13.3%        | 33.8%        | 46.2%         | 11.2%        | 31.4%        | 45.2%        |
|           | Choose-One  |               | 12.6%        | 32.2%        | 44.4%         | 11.8%        | 32.3%        | 46.5%        |
|           | Choose-One  | ✓             | 13.2%        | 32.9%        | 44.6%         | 11.7%        | 32.4%        | 46.6%        |
|           | CLIP-MIL    |               | <b>14.2%</b> | <b>34.4%</b> | <b>46.8%</b>  | <b>13.7%</b> | <b>35.1%</b> | <b>49.2%</b> |
|           | CLIP-MIL    | ✓             | <b>14.5%</b> | <b>35.3%</b> | <b>47.2%</b>  | <b>13.0%</b> | <b>34.4%</b> | <b>48.1%</b> |
| Few-Shot  | CLIP [4]    |               | 10.7%        | 28.7%        | 40.6%         | 11.2%        | 30.8%        | 44.9%        |
|           | Concatenate |               | 10.5%        | 31.2%        | 44.7%         | 11.9%        | 30.9%        | 46.9%        |
|           | Concatenate | ✓             | 12.0%        | 31.5%        | 44.9%         | 13.0%        | 34.1%        | 48.7%        |
|           | Choose-One  |               | <b>14.7%</b> | 37.7%        | 51.7%         | 13.8%        | 36.3%        | 51.3%        |
|           | Choose-One  | ✓             | 12.9%        | 32.1%        | 45.1%         | 11.9%        | 33.5%        | 47.5%        |
|           | CLIP-MIL    |               | <b>19.1%</b> | <b>44.2%</b> | <b>56.8%</b>  | <b>15.8%</b> | <b>41.0%</b> | <b>56.1%</b> |
|           | CLIP-MIL    | ✓             | <b>19.1%</b> | <b>40.7%</b> | <b>53.3%</b>  | <b>17.3%</b> | <b>40.3%</b> | <b>53.8%</b> |
| Many-Shot | CLIP [4]    |               | 15.7%        | 32.8%        | 43.2%         | 15.5%        | 39.7%        | 53.5%        |
|           | Concatenate |               | 15.1%        | 32.1%        | 44.7%         | 14.3%        | 39.4%        | 54.8%        |
|           | Concatenate | ✓             | 20.8%        | 37.6%        | 49.3%         | 19.0%        | 45.6%        | 60.3%        |
|           | Choose-One  |               | 24.1%        | 49.1%        | 61.1%         | 21.9%        | 53.3%        | 68.4%        |
|           | Choose-One  | ✓             | 30.9%        | <b>57.0%</b> | <b>67.9%</b>  | 24.4%        | 57.3%        | 71.5%        |
|           | CLIP-MIL    |               | <b>31.2%</b> | 55.2%        | 66.2%         | <b>27.3%</b> | <b>60.1%</b> | <b>73.3%</b> |
|           | CLIP-MIL    | ✓             | <b>40.1%</b> | <b>61.9%</b> | <b>71.0%</b>  | <b>33.6%</b> | <b>65.1%</b> | <b>76.8%</b> |

151 shows the result and compares the same model trained from scratch vs starting from a pre-trained  
 152 CLIP model. We also include the locked and unlocked versions of the visual encoder. The advantage  
 153 of starting from a strong pre-trained model is clear and raises the assumption that starting from a  
 154 better pre-trained model will yield better results, also verified by the experiments using ViT-L/14  
 155 CLIP architecture in section 4.2.

156 **4.5 IKEA US yearly catalogues**

157 The IKEA data represents a different expert task - one of large-scale sales inventory (thousands of  
 158 items). As with the technical documentation, sales catalogues naturally populate the long-tail of  
 159 the common-objects biased data distributions used to train foundation models. Table 8 presents the  
 160 results for the proposed baselines trained and tested on the IKEA dataset. Since in this case there are  
 161 no distinct manufacturers and we did not like to partition on different yearly fashion styles due to their  
 162 inconsistent nature, we followed a simple 5-fold cross-validation protocol using the entire IKEA data.  
 163 Notably the IKEA dataset was processed using the same pipeline as the car manuals verifying the  
 164 scalability of the proposed automatic annotation approach. As for the car manuals, also on IKEA data  
 165 MIL based baselines obtaining significant advantages over other baselines. Interestingly, on IKEA  
 166 data we also observe that both strategies that avoid direct use of the multiple annotation hypotheses  
 167 (Concatenate and Choose-One) not only under-perform the MIL baselines, but also worsen the results

Table 7: **Initializing with a Pre-trained CLIP400M VS from Scratch.** Numbers in **bold** mark the best results while numbers in **blue** mark the second-best.

|           |          | Image-to-Text |        |              |              |              | Text-to-Image |              |              |
|-----------|----------|---------------|--------|--------------|--------------|--------------|---------------|--------------|--------------|
|           | Name     | Pre-trained   | Locked | Rec@1        | Rec@5        | Rec@10       | Rec@1         | Rec@5        | Rec@10       |
| Zero-Shot | CLIP-MIL | ✓             |        | <b>10.5%</b> | <b>34.0%</b> | <b>48.5%</b> | <b>11.7%</b>  | <b>32.9%</b> | <b>47.9%</b> |
|           |          | ✓             | ✓      | <b>11.0%</b> | <b>29.2%</b> | <b>40.0%</b> | <b>9.7%</b>   | <b>28.1%</b> | <b>40.6%</b> |
|           |          |               | ✓      | 3.4%         | 13.5%        | 23.0%        | 3.2%          | 16.3%        | 30.1%        |
|           |          |               |        | 4.2%         | 14.3%        | 24.6%        | 3.9%          | 18.3%        | 31.0%        |
| One-Shot  | CLIP-MIL | ✓             |        | <b>11.0%</b> | <b>30.3%</b> | <b>43.2%</b> | <b>9.9%</b>   | <b>27.9%</b> | <b>40.9%</b> |
|           |          | ✓             | ✓      | <b>11.9%</b> | <b>30.3%</b> | <b>42.5%</b> | <b>10.9%</b>  | <b>29.4%</b> | <b>43.2%</b> |
|           |          |               | ✓      | 5.2%         | 16.9%        | 28.1%        | 4.4%          | 19.2%        | 32.9%        |
|           |          |               |        | 5.3%         | 16.9%        | 27.4%        | 4.3%          | 17.8%        | 31.0%        |
| Few-Shot  | CLIP-MIL | ✓             |        | <b>14.1%</b> | <b>36.7%</b> | <b>48.9%</b> | <b>15.0%</b>  | <b>35.2%</b> | <b>50.0%</b> |
|           |          | ✓             | ✓      | <b>13.8%</b> | <b>33.7%</b> | <b>47.5%</b> | <b>11.6%</b>  | <b>33.0%</b> | <b>47.0%</b> |
|           |          |               | ✓      | 8.4%         | 25.1%        | 37.8%        | 6.7%          | 25.0%        | 39.0%        |
|           |          |               |        | 8.5%         | 24.9%        | 36.0%        | 6.1%          | 23.4%        | 36.6%        |
| Many-Shot | CLIP-MIL | ✓             |        | <b>32.6%</b> | <b>56.2%</b> | <b>66.7%</b> | <b>27.8%</b>  | <b>59.0%</b> | <b>72.3%</b> |
|           |          | ✓             | ✓      | <b>34.5%</b> | <b>56.8%</b> | <b>66.1%</b> | <b>27.2%</b>  | <b>57.9%</b> | <b>70.7%</b> |
|           |          |               | ✓      | 29.1%        | 48.6%        | 58.1%        | 25.0%         | 52.3%        | 65.2%        |
|           |          |               |        | 24.7%        | 44.5%        | 54.7%        | 19.3%         | 46.6%        | 61.4%        |

168 relative to the CLIP baseline. This is likely due to sharper distinction between different associated  
169 text hypotheses, with only one of them being correct and other not only unrelated, but even belonging  
170 to other objects on the same (commonly densely packed) page. In such situation, non-MIL solutions  
171 are in significant disadvantage since as opposed to MIL they do not consider all the options at once  
172 with the logically accurate OR relation between possible labels, thus leading the model astray with  
173 wrongful gradient updates using losses computed with incorrect labels.

Table 8: **Results on IKEA dataset** using 5-fold cross-validation protocol on the entire IKEA US early manuals data. MIL based baselines obtain significant advantages over other baselines. Concatenate and Choose-One worsen the results of the CLIP baseline, likely due to only one of text label hypothesis (from the automatically extracted co-located set) being correct while others belong to other objects on the same (densely packed) page. In such situation, non-MIL solutions are in significant disadvantage since as they do not consider all the options at once with the logically accurate OR relation (as does MIL), thus leading the model astray with wrongful gradient updates from losses computed with incorrect labels. Numbers in **bold** mark the best results while numbers in **blue** mark the second-best.

|          |             | Image-to-Text |              |              |              |              | Text-to-Image |              |  |
|----------|-------------|---------------|--------------|--------------|--------------|--------------|---------------|--------------|--|
|          | Name        | Locked        | Rec@1        | Rec@5        | Rec@10       | Rec@1        | Rec@5         | Rec@10       |  |
| All-Data | CLIP [4]    |               | 22.9%        | 43.3%        | 54.2%        | 25.5%        | 46.8%         | 59.5%        |  |
|          | Concatenate |               | 6.7%         | 13.7%        | 18.2%        | 13.2%        | 27.0%         | 35.9%        |  |
|          | Concatenate | ✓             | 8.1%         | 15.6%        | 20.6%        | 14.0%        | 26.9%         | 35.3%        |  |
|          | Choose-One  |               | 15.1%        | 30.2%        | 38.5%        | 17.9%        | 36.2%         | 46.4%        |  |
|          | Choose-One  | ✓             | 14.1%        | 28.0%        | 35.3%        | 16.4%        | 32.3%         | 41.8%        |  |
|          | CLIP-MIL    |               | <b>26.8%</b> | <b>47.7%</b> | <b>57.8%</b> | <b>30.1%</b> | <b>54.4%</b>  | <b>66.2%</b> |  |
|          | CLIP-MIL    | ✓             | <b>24.4%</b> | <b>44.4%</b> | <b>54.7%</b> | <b>27.0%</b> | <b>49.9%</b>  | <b>60.5%</b> |  |

#### 174 4.6 Single fold reference results for quicker evaluation by future benchmark users

175 All experiments in the paper and other parts of this supplementary were performed using 5-fold  
176 cross-validation. Yet it is time consuming to evaluate many models 5 times. Therefore, as a service  
177 to the future users of our proposed FETA benchmark, in Table 9 we also provide reference results



178 for a single fold out of the 5 we defined for the full evaluation. As can be seen from the table, the  
 179 relative performance trends are preserved also in this single fold evaluation and hence it can serve as  
 180 a reference for quicker evaluation for future users, before they run the full evaluation that takes 5  
 181 times longer. We provide a script to run this exact fold split in our code package for reproducibility.

Table 9: **Single fold reference results for quicker evaluation by future benchmark users.** Provided as a service to the future users of our proposed FETA benchmark by stating a 5 times faster (then full 5-fold cross val.) to compute reproducible evaluation reference point. Intended to facilitate faster evaluation & debugging of new methods. The exact split is enclosed in the benchmark code. Numbers in **bold** mark the best results while numbers in **blue** mark the second-best.

|           |             | Image-to-Text |              |              | Text-to-Image |              |              |              |
|-----------|-------------|---------------|--------------|--------------|---------------|--------------|--------------|--------------|
|           | Name        | Locked        | Rec@1        | Rec@5        | Rec@10        | Rec@1        | Rec@5        | Rec@10       |
| Zero-Shot | CLIP [4]    |               | 9.7%         | 26.6%        | 38.1%         | <b>10.1%</b> | 26.7%        | 39.4%        |
|           | Concatenate |               | 6.5%         | 20.4%        | 31.5%         | 7.1%         | 25.0%        | 38.4%        |
|           | Concatenate | ✓             | 9.4%         | 25.0%        | 36.7%         | 8.1%         | 24.0%        | 37.6%        |
|           | Choose-One  |               | <b>10.7%</b> | 27.6%        | 39.9%         | 9.3%         | 28.1%        | 41.8%        |
|           | Choose-One  | ✓             | 10.4%        | 26.7%        | 39.3%         | 9.2%         | 25.6%        | 37.9%        |
|           | CLIP-MIL    |               | 10.5%        | <b>34.0%</b> | <b>48.5%</b>  | <b>11.7%</b> | <b>32.9%</b> | <b>47.9%</b> |
|           | CLIP-MIL    | ✓             | <b>11.0%</b> | <b>29.2%</b> | <b>40.0%</b>  | 9.7%         | <b>28.1%</b> | <b>40.6%</b> |
| One-Shot  | CLIP [4]    |               | <b>9.7%</b>  | <b>26.6%</b> | <b>38.1%</b>  | <b>10.1%</b> | 26.7%        | 39.4%        |
|           | Concatenate |               | 7.3%         | 22.0%        | 33.5%         | 7.6%         | 24.7%        | 39.6%        |
|           | Concatenate | ✓             | 7.1%         | 20.5%        | 32.8%         | 6.9%         | 23.6%        | 37.9%        |
|           | Choose-One  |               | 8.9%         | 25.9%        | 37.8%         | <b>8.7%</b>  | <b>28.2%</b> | <b>42.1%</b> |
|           | Choose-One  | ✓             | 7.5%         | 23.1%        | 35.3%         | 7.4%         | 23.9%        | 39.2%        |
|           | CLIP-MIL    |               | <b>11.0%</b> | <b>28.7%</b> | <b>40.4%</b>  | <b>10.1%</b> | <b>29.7%</b> | <b>44.1%</b> |
|           | CLIP-MIL    | ✓             | 9.2%         | 24.8%        | 36.9%         | 8.1%         | 27.2%        | 41.6%        |
| Few-Shot  | CLIP [4]    |               | 8.6%         | 25.6%        | 37.2%         | 9.2%         | 24.3%        | 36.6%        |
|           | Concatenate |               | 6.9%         | 24.8%        | 38.2%         | 10.7%        | 29.6%        | 45.4%        |
|           | Concatenate | ✓             | 9.6%         | 23.0%        | 35.0%         | 10.3%        | 30.1%        | 42.1%        |
|           | Choose-One  |               | 11.7%        | 33.3%        | 45.3%         | 11.8%        | 33.0%        | <b>49.2%</b> |
|           | Choose-One  | ✓             | <b>14.9%</b> | 33.8%        | <b>47.6%</b>  | 11.9%        | 29.2%        | 44.5%        |
|           | CLIP-MIL    |               | <b>17.6%</b> | <b>40.8%</b> | <b>53.5%</b>  | <b>16.0%</b> | <b>39.6%</b> | <b>53.9%</b> |
|           | CLIP-MIL    | ✓             | 13.1%        | <b>37.1%</b> | 47.2%         | <b>12.0%</b> | <b>33.4%</b> | 48.3%        |
| Many-Shot | CLIP [4]    |               | 13.8%        | 31.2%        | 41.6%         | 13.6%        | 36.4%        | 50.7%        |
|           | Concatenate |               | 18.9%        | 38.1%        | 48.0%         | 16.9%        | 44.7%        | 59.9%        |
|           | Concatenate | ✓             | 19.2%        | 38.0%        | 49.2%         | 15.8%        | 40.3%        | 54.9%        |
|           | Choose-One  |               | 22.5%        | 48.6%        | 60.5%         | 20.5%        | 50.9%        | 65.3%        |
|           | Choose-One  | ✓             | 28.1%        | 52.2%        | 63.4%         | 22.2%        | 52.9%        | 67.0%        |
|           | CLIP-MIL    |               | <b>31.7%</b> | <b>55.5%</b> | <b>66.6%</b>  | <b>27.8%</b> | <b>59.9%</b> | <b>72.6%</b> |
|           | CLIP-MIL    | ✓             | <b>35.5%</b> | <b>58.3%</b> | <b>67.0%</b>  | <b>29.0%</b> | <b>59.1%</b> | <b>71.6%</b> |

#### 182 4.7 Median Results of Main Table 2

183 For completion we add the results of Few-Shot and Many-Shot settings from table 2 of the main  
 184 manuscript with the difference of using Median instead of average

#### 185 4.8 Illustrative explanation of our MIL variants

186 In Figure 4 we give an illustrative explanation of our MIL methods. Our MIL variant is composed  
 187 of many to many MIL, many images to many texts, for the sake of simplicity we show here one to  
 188 many MIL, image to texts MIL. Text to images MIL is very similar and thus not displayed. Each  
 189 MIL block in the figure receives as inputs one image and many texts, a bag of positive texts chosen  
 190 by our automatic annotation process and many negative texts taken from other pages the dataset. The  
 191 output is detailed in Figure 4 and is used for the calculation of the loss. The figure is a schematic

Table 10: **Median results of Table 2 of the manuscript** Image-to-Text and Text-to-Image retrieval accuracy, same models and settings as in Table 2 but using median instead of average. Numbers in **bold** mark the best results while numbers in **blue** mark the second-best.

|           |             | Image-to-Text |       |       | Text-to-Image |       |       |        |
|-----------|-------------|---------------|-------|-------|---------------|-------|-------|--------|
|           | Name        | Locked        | Rec@1 | Rec@5 | Rec@10        | Rec@1 | Rec@5 | Rec@10 |
| Few-Shot  | CLIP [4]    |               | 9.1%  | 25.5% | 36.2%         | 9.9%  | 23.7% | 35.6%  |
|           | Concatenate |               | 8.5%  | 24.2% | 39.8%         | 10.2% | 29.8% | 45.1%  |
|           | Concatenate | ✓             | 8.4%  | 23.3% | 37.2%         | 10.0% | 27.8% | 40.6%  |
|           | Choose-One  |               | 11.1% | 29.9% | 44.3%         | 12.1% | 33.4% | 46.2%  |
|           | Choose-One  | ✓             | 11.7% | 31.2% | 44.2%         | 10.0% | 29.6% | 43.7%  |
|           | CLIP-MIL    |               | 11.9% | 33.9% | 50.9%         | 14.3% | 35.3% | 53.1%  |
|           | CLIP-MIL    | ✓             | 10.6% | 31.3% | 46.9%         | 9.9%  | 30.9% | 47.4%  |
| Many-Shot | CLIP [4]    |               | 13.8% | 31.2% | 41.6%         | 16.6% | 36.4% | 50.7%  |
|           | Concatenate |               | 18.4% | 38.1% | 49.3%         | 16.1% | 43.4% | 59.6%  |
|           | Concatenate | ✓             | 20.2% | 40.1% | 51.2%         | 16.5% | 41.8% | 59.9%  |
|           | Choose-One  |               | 24.6% | 50.9% | 62.9%         | 21.1% | 53.0% | 67.6%  |
|           | Choose-One  | ✓             | 28.0% | 53.3% | 64.8%         | 22.2% | 52.9% | 67.1%  |
|           | CLIP-MIL    |               | 31.8% | 56.0% | 66.7%         | 27.9% | 59.4% | 72.3%  |
|           | CLIP-MIL    | ✓             | 34.3% | 56.3% | 66.1%         | 27.3% | 58.4% | 71.2%  |

192 flowchart created for the purpose of intuition, the exact specifications of those losses are explained in  
 193 Section 3 of the main paper.

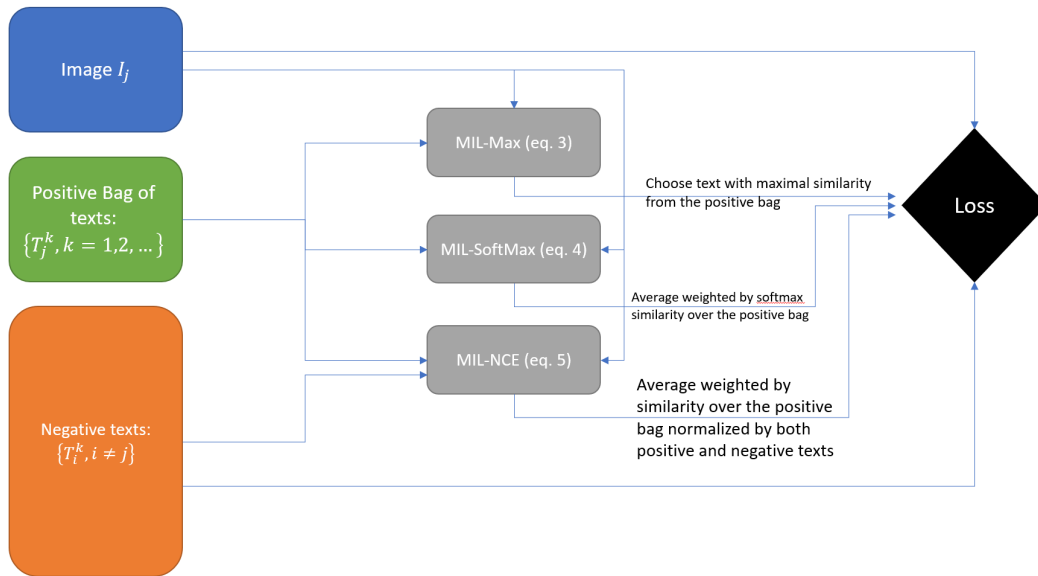

Figure 4: **Illustrative explanation of our MIL variants:** An example of one way MIL, from one image to a bag of texts. The figure is added for intuition only, the accurate details are in main paper section 3.

## 194 5 Code

195 The code is attached to this supplementary in "code.zip". The instructions for:

- 196 1. Automatic PDFs processing pipeline
- 197 2. Subsequent data pre-processing

198

3. Running the baselines

199

4. Evaluation of the baselines performance

200

are enclosed within in a contained README.md file. The APIs for the automatic PDF processing

201

pipeline will become openly available upon acceptance. For the benchmark release we will also

202

modify the massive runs scripts to support the main cluster configurations (e.g. SLURM), currently

203

they are provided only for reference and utilize our internal (LSF) cluster architecture.

204

## 6 Data download instructions

205

The data set is hosted on the IBM Cloud. In order to download the file please follow this commands:

206

» wget https://ai-vision-public-datasets.s3.eu.cloud-object-storage.appdomain.cloud/FETA/feta.tar.gz

207

» tar -xvzf feta.tar.gz

208

Inside the tar file there is README\_data.md which explains how to use the data and how to easily

209

obtain texts and images per document. We also add instructions here: In the tar, Car manuals and

210

IKEA data are provided. To use the data: 1.Copy data to any desired path. 2. When running

211

FETA code, set -train-data and -val-data to the pkl file inside each of these two data repositories.

212

Detailed annotation and text of the entire data, pages and images are available in the pkl file which

213

is located in the main directory of each dataset. We also provide humanly readable tsv files to

214

make it easier to manually look at parts of the data. Each document has its own tsv file under

215

<data\_name>/texts/<doc\_name>.tsv . Inside each tsv file, which can be opened in Excel or as a text

216

file, there are four columns listing the texts and main annotations of the document: page\_number,

217

text\_ind, text, bbox.

218

## 7 License

219

This dataset is freely available: it can be redistribute under the terms of the GNU General Public

220

License (version 3) as published by the Free Software Foundation. The full license is attached to the

221

supplementary material as License.md

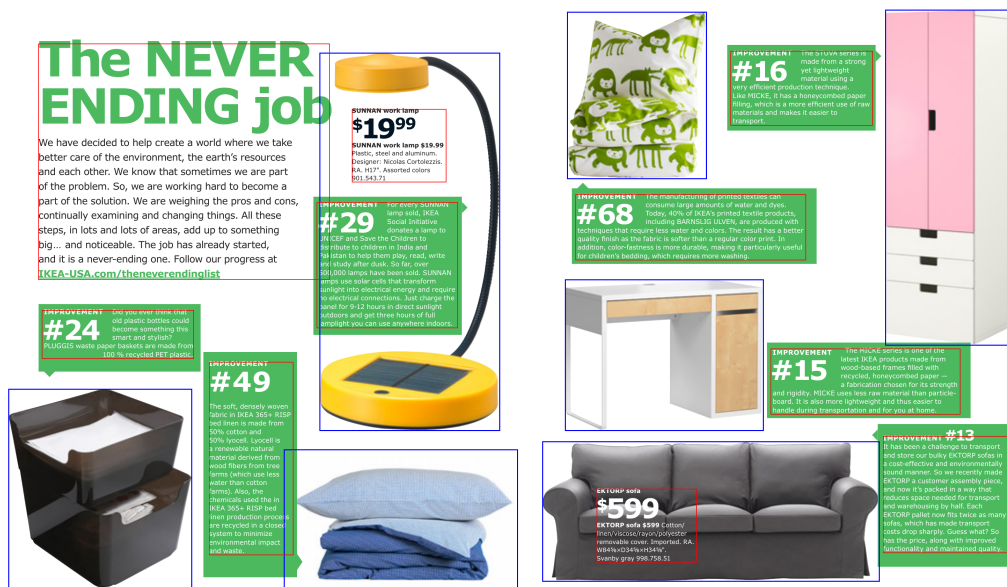

Figure 5: **Examples from the IKEA dataset:** In this example we can see the bounding box of all the detected texts within the page marked in a red box. The images are marked in a blue box.

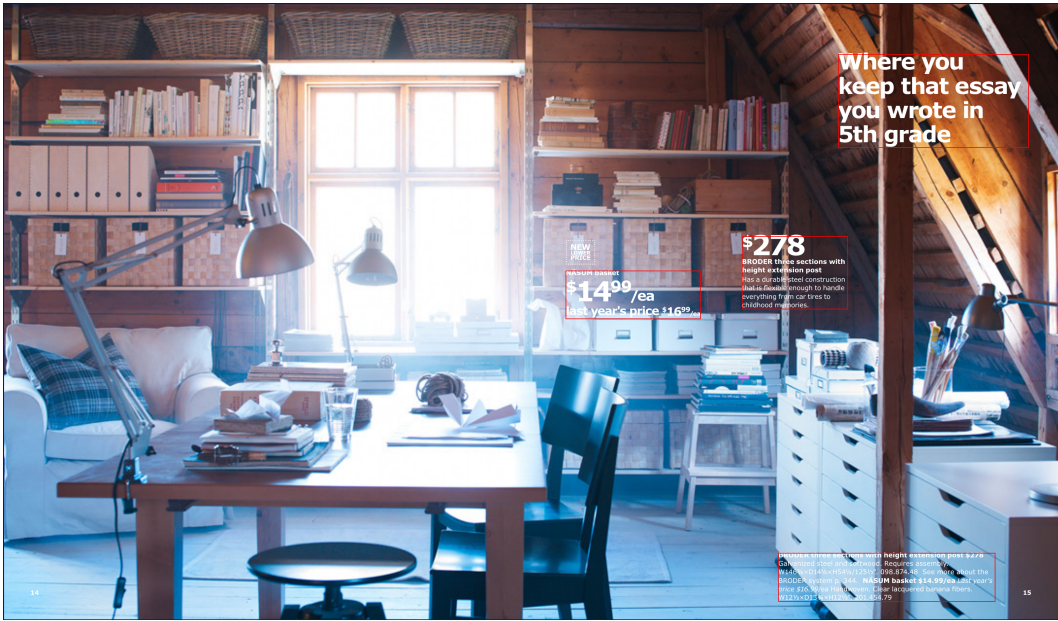

Figure 6: Examples from the IKEA dataset: In this example we can see the bounding box of all the detected texts within the page marked in a red box. The images are marked in a blue box.

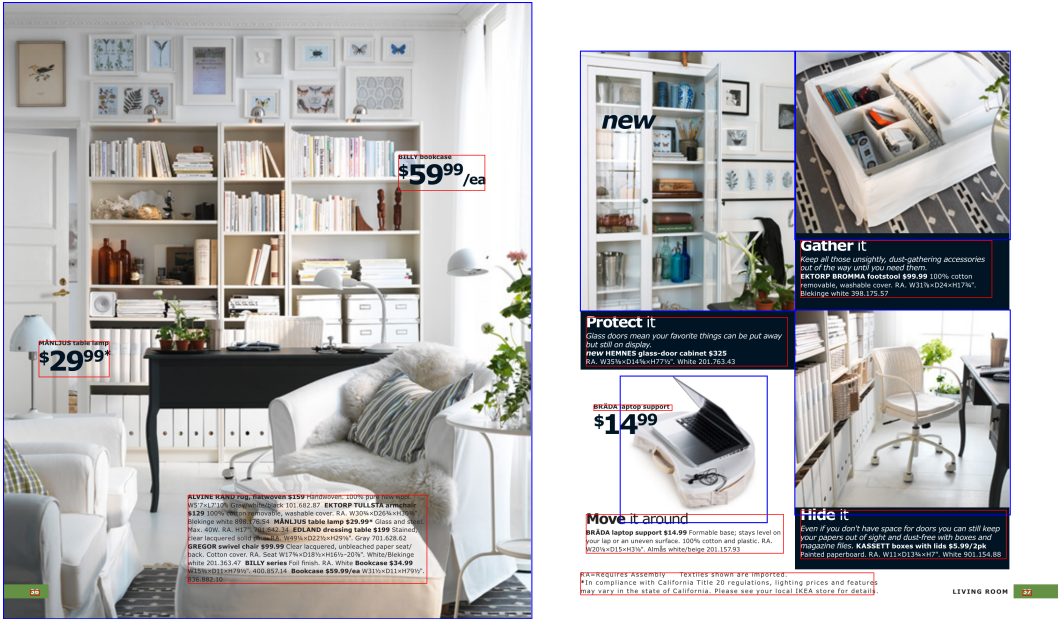

Figure 7: Examples from the IKEA dataset: In this example we can see the bounding box of all the detected texts within the page marked in a red box. Only the images are marked in a blue box.

## Instrument cluster

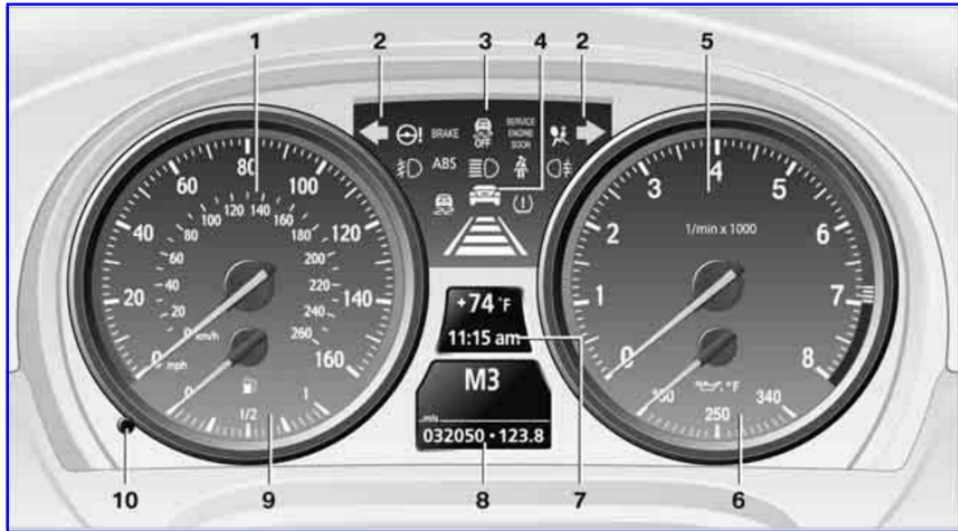

- 1 Speedometer
- 2 Indicator lamps for turn signals
- 3 Indicator and warning lamps [13](#)
- 4 Displays for Active Cruise Control [75](#)
- 5 Tachometer [83](#)
- 6 Engine oil temperature [83](#)
- 7 Display for
  - ▷ Clock [82](#)
  - ▷ Outside temperature [82](#)
  - ▷ Indicator and warning lamps [92](#)

- 8 Display for
  - ▷ Position of automatic transmission [64](#)
  - ▷ Gear indicator of 7-gear Sport automatic transmission with double clutch [66](#)
  - ▷ Computer [84](#)
  - ▷ Date of next scheduled service, and remaining distance to be driven [87](#)
  - ▷ Odometer and trip odometer [82](#)
  - ▷ High-beam Assistant [113](#)
  - ▷ Checking the oil level [260](#)
  - ▷ Settings and information [86](#)
  - ▷ ▲ There is a Check Control message [92](#)
- 9 Fuel gauge [83](#)
- 10 Resetting the trip odometer [82](#)

Figure 8: **Examples from the expert car manuals dataset:** In this example we can see the bounding box of all the detected texts withing the page marked in a red box. The images are marked in a blue box.

## iDrive

### Vehicle equipment

In this chapter, all production, country, and optional equipment that is offered in the model range is described. For this reason, descriptions will be given of some equipment that may not be available in a vehicle, for example due to the special options or national-market version selected. This also applies to safety related functions and systems.

### The concept

iDrive integrates the functions of a large number of switches. This allows these functions to be operated from a single central position.

**!** Make entries only when traffic and road conditions permit; otherwise, you may endanger vehicle occupants and other road users by being distracted. ◀

### Controls at a glance

#### Controls

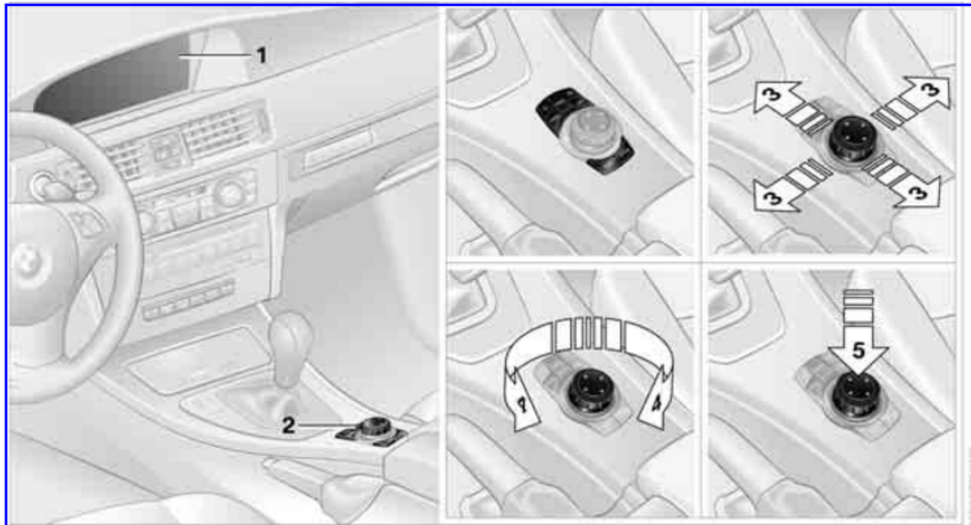

- |                                                                                                                                                                                                          |                                                                                                               |
|----------------------------------------------------------------------------------------------------------------------------------------------------------------------------------------------------------|---------------------------------------------------------------------------------------------------------------|
| <p><b>1</b> Control Display</p> <p><b>2</b> Controller with buttons<br/>You can use the buttons to open the menus directly. The controller can be used to select the menu items and create settings.</p> | <p>▷ Move in four directions, arrows <b>3</b></p> <p>▷ Turn, arrow <b>4</b></p> <p>▷ Push, arrow <b>5</b></p> |
|----------------------------------------------------------------------------------------------------------------------------------------------------------------------------------------------------------|---------------------------------------------------------------------------------------------------------------|

Figure 9: **Examples from the expert car manuals dataset:** In this example we can see the bounding box of all the detected and **associated** texts within the page marked in a **red** box. The images are marked in a **blue** box.

 The warning lamp in the instrument cluster lights up while the engine is running: the remote control is no longer inside the vehicle. After the engine is switched off, the engine can only be restarted within approx. 10 seconds.

 The indicator lamp in the instrument cluster lights up and a message appears on the Control Display: replace the battery in the remote control.

**Replacing the battery**

The remote control for Comfort Access contains a battery that will need to be replaced from time to time.

1. Take the integrated key out of the remote control, refer to page 30.

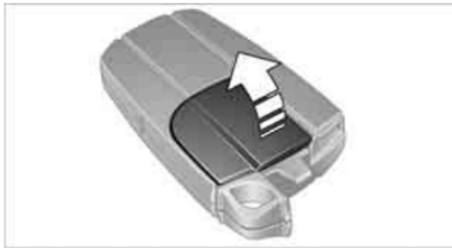

2. Remove the cover.
3. Insert the new battery with the plus side facing up.
4. Press the cover on to close.

 Dispose of the old battery at a collection point or at your BMW center. ◀

**Windows**

 To prevent injuries, watch the windows while closing them. Take the remote control with you when you leave the car; otherwise, children could operate the electric windows and possibly injure themselves. ◀

**Coupe: opening, closing**

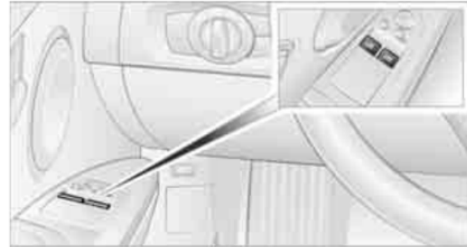

- ▶ Press the switch to the resistance point: The window opens as long as you press the switch.
- ▶ Press the switch beyond the resistance point: The window opens automatically. Press the switch again to stop the opening movement.

You can close the windows in the same manner by pulling the switch.

**Convertible: opening, closing**  
**Individually**

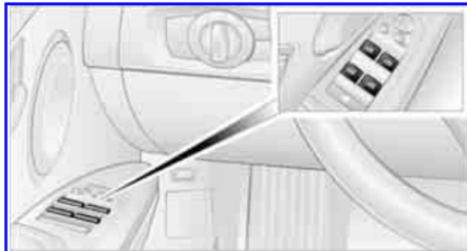

- ▶ Press the switch to the resistance point: The window opens as long as you press the switch.
- ▶ Press the switch beyond the resistance point: The window opens automatically. Press the switch again to stop the opening movement.

You can close the windows in the same manner by pulling the switch. The rear windows do not close automatically.

Figure 10: **Examples from the expert car manuals dataset:** In this example we can see the bounding box of all the detected and **associated** texts within the page marked in a red box. One image is marked in a blue box.

222 **References**

- 223 [1] Mathilde Caron, Hugo Touvron, Ishan Misra, Hervé Jégou, Julien Mairal, Piotr Bojanowski, and  
224 Armand Joulin. Emerging properties in self-supervised vision transformers. In *Proceedings of*  
225 *the International Conference on Computer Vision (ICCV)*, 2021. 1
- 226 [2] Wonjae Kim, Bokyung Son, and Ildoo Kim. Vilt: Vision-and-language transformer without  
227 convolution or region supervision, 2021. 6
- 228 [3] Junnan Li, Ramprasaath R. Selvaraju, Akhilesh Deepak Gotmare, Shafiq Joty, Caiming Xiong,  
229 and Steven Hoi. Align before fuse: Vision and language representation learning with momentum  
230 distillation, 2021. 6
- 231 [4] Alec Radford, Jong Wook Kim, Chris Hallacy, Aditya Ramesh, Gabriel Goh, Sandhini Agarwal,  
232 Girish Sastry, Amanda Askell, Pamela Mishkin, Jack Clark, Gretchen Krueger, and Ilya Sutskever.  
233 Learning transferable visual models from natural language supervision, 2021. 7, 8, 9, 10
- 234 [5] Amanpreet Singh, Ronghang Hu, Vedanuj Goswami, Guillaume Couairon, Wojciech Galuba,  
235 Marcus Rohrbach, and Douwe Kiela. Flava: A foundational language and vision alignment  
236 model, 2021. 1, 6
- 237 [6] Jae-Chern Yoo and Tae Hee Han. Fast normalized cross-correlation. *Circuits, systems and signal*  
238 *processing*, 28(6):819–843, 2009. 2
- 239 [7] Tiancheng Zhao, Tianqi Zhang, Mingwei Zhu, Haozhan Shen, Kyusong Lee, Xiaopeng Lu, and  
240 Jianwei Yin. V1-checklist: Evaluating pre-trained vision-language models with objects, attributes  
241 and relations, 2022. 6
- 242 [8] Yi Zheng, Qitong Wang, and Margrit Betke. Semantic-based sentence recognition in images  
243 using bimodal deep learning. In *2021 IEEE International Conference on Image Processing*  
244 *(ICIP)*, pages 2753–2757, 2021. 1
